# Supplementary material for: Likelihood that expectations of informal care will be met at onset of caregiving need: a retrospective study of older adults in the USA
Source: PubMed Central journal article supplement — BMJ Open. 2017 Dec 19;7(12):e017791. doi: 10.1136/bmjopen-2017-017791 (PMC5778317; doi:10.1136/bmjopen-2017-017791), 2017-12-19
Supplement: bmjopen-2017-017791.draft_revisions.pdf [file bmjopen-2017-017791.draft_revisions.pdf]

# BMJ Open

BMJ Open is committed to open peer review. As part of this commitment we make the peer review history of every article we publish publicly available.

When an article is published we post the peer reviewers' comments and the authors' responses online. We also post the versions of the paper that were used during peer review. These are the versions that the peer review comments apply to.

The versions of the paper that follow are the versions that were submitted during the peer review process. They are not the versions of record or the final published versions. They should not be cited or distributed as the published version of this manuscript.

BMJ Open is an open access journal and the full, final, typeset and author-corrected version of record of the manuscript is available on our site with no access controls, subscription charges or pay-per-view fees (<http://bmjopen.bmj.com>).

If you have any questions on BMJ Open's open peer review process please email [editorial.bmjopen@bmj.com](mailto:editorial.bmjopen@bmj.com)

# BMJ Open

## Likelihood that Expectations of Informal Care will be Met at Onset of Caregiving Need

|                                 |                                                                                                                                                                                    |
|---------------------------------|------------------------------------------------------------------------------------------------------------------------------------------------------------------------------------|
| Journal:                        | <i>BMJ Open</i>                                                                                                                                                                    |
| Manuscript ID                   | bmjopen-2017-017791                                                                                                                                                                |
| Article Type:                   | Research                                                                                                                                                                           |
| Date Submitted by the Author:   | 18-May-2017                                                                                                                                                                        |
| Complete List of Authors:       | Abrahamson, Kathleen; Purdue University College of Health and Human Sciences,<br>Hass, Zachary; Purdue University College of Health and Human Sciences<br>Sands, LP; Virginia Tech |
| <b>Primary Subject Heading</b>: | Geriatric medicine                                                                                                                                                                 |
| Secondary Subject Heading:      | Health services research                                                                                                                                                           |
| Keywords:                       | caregiving, long term care, expectations of care                                                                                                                                   |
|                                 |                                                                                                                                                                                    |

SCHOLARONE™  
Manuscripts

1  
2  
3  
4  
5  
6  
7  
8  
9  
10  
11  
12  
13  
14  
15  
16  
17  
18  
19  
20  
21  
22  
23  
24  
25  
26  
27  
28  
29  
30  
31  
32  
33  
34  
35  
36  
37  
38  
39  
40  
41  
42  
43  
44  
45  
46  
47  
48  
49  
50  
51  
52  
53  
54  
55  
56  
57  
58  
59  
60

Likelihood that Expectations of Informal Care will be Met at Onset of  
Caregiving Need

Kathleen Abrahamson, PhD, RN

Assistant Professor, Purdue University School of Nursing

502 N. University Street

West Lafayette, IN 47907

765-494-4019

[kaabraha@purdue.edu](mailto:kaabraha@purdue.edu)

Zachary Hass, MS

Purdue University

[zhass@purdue.edu](mailto:zhass@purdue.edu)

Laura Sands, PhD

Virginia Polytechnic Institute and State University

[lsands@exchange.vt.edu](mailto:lsands@exchange.vt.edu)

**Abstract:**

Aging adults are likely to expect informal caregiving assistance from a friend or family member, reflecting the reality that most long term care (LTC) is provided by family and friends. The purpose of the study was to determine the likelihood that expectations of care will be unmet at the onset of functional disability, and factors that impact that likelihood.

**Methods:** Community dwelling respondents from bi-annual repeated assessments (2006-2010) of the Health and Retirement Study (HRS) over age 65 who expressed a caregiving expectation prior to **need** were included in the final analytic sample (n=1,352). Logistic regression and change models were specified to address impact of variables on unmet expectations.

**Results:** Expectations of care were unmet for almost one-third (32%) of the sample, among whom 30% were not receiving needed care. Unmet expectations were associated with being unmarried, older, and having a higher number of ADL deficits. Change over time in a number of predictor variables influenced the likelihood of unmet expectations.

**Conclusions:** Unplanned dependence on formal care systems and/or having unmet care needs places elders at risk of negative outcomes. Knowledge of factors that impact whether expected care is eventually received provides robust evidence for counseling individuals regarding the need to plan for additional LTC services.

## Strengths and Weaknesses of the Study

- Use of a large, representative data set allows for testing of the predictive value of personal expectations on likelihood that expected care will be received, a novel question that can inform personal discussions and policy decisions.
- The complex details surrounding care giving decisions are not available in this data, and future research would benefit from qualitative work which supplements these findings.
- It is not clear whether those who did not receive care from the expected source but are receiving adequate care are satisfied with their informal caregiving arrangement; a significant limitation to the meaningful application of these findings.

## Background

The majority of Americans underestimate their future need for long term services and supports (LTSS).<sup>1</sup> Between 2010 and 2040 the number of Americans needing LTSS is projected to more than double to over 40 million,<sup>2</sup> and this may be an underestimate given current levels of disability risk among the middle aged and young-old.<sup>3</sup> Yet studies have shown that a sizeable proportion of Americans do not believe they will need LTSS in the future.<sup>1, 4, 5</sup> The majority of Americans have not adequately planned for future LTSS needs.<sup>6, 7</sup> Planning in the absence of crisis is rare, and many Americans erroneously perceive that Medicare or other public funds are readily available to assist with LTSS financing. Robison et al. found that 31% of surveyed middle-aged and older adults had no plans to finance their LTSS needs, 45% planned to rely on Medicare (which only funds limited post-acute or skilled nursing services), and

1  
2  
3 yet 90% planned to remain in their own home. Underestimation of future LTSS needs  
4  
5 and overestimation of LTSS financing options, combined with little individual planning  
6  
7  
8 for LTSS leaves individuals at risk for unmet care needs and poor personal outcomes.  
9

10 The number of Americans with LTC needs is large and expanding rapidly at a  
11  
12 time in United States history when access to trained caregiving personnel and public  
13  
14 financial resources are diminishing. Demands of friends and family to provide LTC are  
15  
16 common and will invariably increase in relation to predicted demographic and economic  
17  
18 trends.<sup>8,9</sup> The Caregiver Support Ratio, defined as the number of adults aged 45-64  
19  
20 available to care for each person aged 80 and over is expected to decrease from 7:1 in  
21  
22 2010 to 4:1 in 2030 and 3:1 in 2050.<sup>8</sup> Informal caregivers are often unprepared or  
23  
24 unavailable to provide care, leaving an individual to become dependent upon paid  
25  
26 (formal) care services or face unmet care needs.<sup>10, 11</sup>  
27  
28  
29  
30  
31

32 Despite the lack of overt planning for LTSS needs, people have expectations  
33  
34 regarding living arrangements and caregiving when a need arises. Henning-Smith and  
35  
36 Shippee (2015) found that 73% of respondents to the National Health Interview Survey  
37  
38 expected a family member to provide care, a significantly higher number of respondents  
39  
40 than those who expected to rely upon professional services or paid care for assistance.  
41  
42 Research has also demonstrated that persons who expect to receive care from a family  
43  
44 member are less likely to purchase long term care insurance, placing them at risk if the  
45  
46 expected informal care is not provided.<sup>4</sup>  
47  
48  
49

50 Previous researchers have shown that the parental expectations that a child will  
51  
52 become their caregiver significantly predict selection of that particular child as caregiver  
53  
54 amongst other siblings.<sup>12</sup> Available literature also shows that mothers demonstrate  
55  
56  
57  
58  
59  
60

1  
2  
3 negative responses when caregiver preferences are unmet.<sup>13</sup> As of yet, the frequency  
4 that expectations of informal care from any source will be met or unmet when need  
5 arises is unknown. It is also unclear what factors influence the likelihood that  
6 expectations for care will be met among a representative sample of older Americans.  
7  
8 The current analyses address those gaps by using a large, nationally representative  
9 sample that expressed an expectation for care and later developed a caregiving need  
10 to answer the following research questions:

- 11 1. How often were caregiving expectations expressed *prior* to disability onset met at the  
12 time of caregiving need?
- 13 2. What individual and situational factors influenced that likelihood that expectations of  
14 care were met?

## 15 **Design and Methods**

16  
17 Data for this study were taken from bi-annual repeated assessments (2002-2010)  
18 of the Health and Retirement Study (HRS). The HRS is sponsored by the National  
19 Institute on Aging (grant number NIA U01AG009740) and is conducted by the University  
20 of Michigan. It is a longitudinal study of a representative sample of about 20,000  
21 Americans over the age of 50. Use of this data was approved by the Institutional Review  
22 Board at the author institution, and authors have no competing interests to declare.  
23  
24 Among large scale studies designed to assess respondents' trajectories toward LTC  
25 needs, the HRS is unique in its inclusion of information about the respondents'  
26 expectations that a specific family member or friend will provide caregiving to the  
27 respondent when needed. Respondents are asked which of their family members or  
28 friends would be willing and able to provide needed help with personal care needs such  
29  
30  
31  
32  
33  
34  
35  
36  
37  
38  
39  
40  
41  
42  
43  
44  
45  
46  
47  
48  
49  
50  
51  
52  
53  
54  
55  
56  
57  
58  
59  
60

1  
2  
3 as eating or dressing. It is assumed in the data that if the respondent has a spouse that  
4  
5 the spouse would be the primary caregiver, but respondents may report additional  
6  
7 potential caregivers allowing for the possibility that a current spouse may not be  
8  
9 available or able to provide caregiving in the future.  
10

### 11 12 *Analytic sample*

13  
14  
15 The sample included all community-dwelling HRS respondents over age 65 in  
16  
17 survey years 2002-2008 who were independent in their ADL tasks in their initial  
18  
19 interview (n=9,546). Respondents who completed the initial interview by proxy and  
20  
21 therefore did not express an expected caregiver were not included in the sample. Of  
22  
23 those 9,546 respondents, 1,670 (17%) developed an ADL deficit (dressing, walking,  
24  
25 transfer mobility, bathing, eating or toileting) that required human help at a data  
26  
27 collection point after their initial interview. Among those who developed a caregiving  
28  
29 need, 1,352 had expressed an expectation of care from a named friend or family  
30  
31 member prior to the need for care. Only those respondents who expressed a caregiving  
32  
33 expectation prior to need were included in the final analytic sample (n=1,352). To  
34  
35 address the proposed research objectives, only respondents who expressed a  
36  
37 caregiving expectation and later developed a caregiving need were included in the  
38  
39 analysis. Characteristics of the analytic sample are displayed in Table 1.  
40  
41  
42  
43  
44

### 45 46 *Measurement and variables*

47  
48 Respondents' informal caregiving expectation was measured by their stated  
49  
50 expectation of care from a named caregiver while still independently performing ADL  
51  
52 tasks (prior to a need for care). An expectation could be stated at each biennial  
53  
54 assessment. Onset of caregiving need was also assessed at each biennial assessment.  
55  
56  
57  
58  
59  
60



1  
2  
3 For each respondent that newly reported the need for caregiving help from another  
4 person it was noted who was providing the needed care. The list of actual caregivers  
5 was then compared by authors to the list of expected caregivers provided by the  
6 respondent at the assessment most proximal and prior to development of the caregiving  
7 need. If the respondent did not report an expectation of informal care in the assessment  
8 just prior to the onset of a caregiving need, the next prior assessment was considered,  
9 and so forth until the expectation most proximal to caregiving onset was identified.  
10  
11  
12  
13  
14  
15  
16  
17  
18  
19

20 The expectation was considered met if the respondent received care from their  
21 spouse or any other named caregiver. An expectation was considered unmet if none of  
22 the expected caregivers were actually providing care to the respondent, including  
23 situations when the respondent did not receive any needed care, received care from  
24 someone other than a spouse or expected caregiver, or received only paid care  
25 services. Predictor variables were selected based upon empirical findings from previous  
26 research, and were taken from the HRS survey. Determination of predictor variables  
27 was guided by Andersen's model of health behavior which describes predisposing,  
28 enabling, and need characteristics that influence need for health related services<sup>14</sup>. The  
29 variables chosen include respondent demographic characteristics reflecting  
30 predisposing characteristics that increase need for care (age, race, education); family  
31 structure (marital status, number of living children) and economic predictors reflecting  
32 characteristics that enable acquisition of care (household income, having Long Term  
33 Care (LTC) insurance), and respondent health and functional status reflecting potential  
34 need for care (cognitive score, number of ADL deficits, self-rated health).  
35  
36  
37  
38  
39  
40  
41  
42  
43  
44  
45  
46  
47  
48  
49  
50  
51  
52  
53  
54

### 55 *Analysis*

56  
57  
58  
59  
60

1  
2  
3 A logistic regression model was fit to assess the relationship between the  
4 predictor variables and the binary outcome variable of whether or not caregiver  
5 expectations were met. A second logistic regression model was fit to assess the  
6 relationship between change over time in predictor variables and likelihood of  
7 met/unmet expectations. Potential predictor variables were assessed in turn in a simple  
8 logistic model and the potential form of their relationship was explored using exploratory  
9 data analysis. Potential interactions were also tested. The best form of each predictor  
10 (as assessed by ROC area under the curve) was then combined into the full models. A  
11 p-value for an estimated effect in the full model below 0.05 was taken to be a  
12 statistically significant effect on the log odds of having expectations for care met.  
13  
14  
15  
16  
17  
18  
19  
20  
21  
22  
23  
24  
25  
26

## 27 **Results**

28  
29 Of the 1,670 respondents who developed a caregiving need the majority  
30 (n=1,352, 81%) had expressed a caregiving expectation prior to onset of need. Adult  
31 child or child-in-law was the most frequently reported expected caregiver (48%),  
32 followed by spouse (35%). No other expected caregiver to recipient relationship  
33 occurred at more than 7% in this sample. Seventy-two percent of caregiving  
34 expectations most proximal to the development of a caregiving need were stated at the  
35 biennial assessment that occurred two years before the onset of need. For 18% of the  
36 analytic sample, the most recent statement of expectations was 4 years prior to  
37 caregiving need, and 7% expressed the most recent expectation of informal care was  
38 recorded 6 years prior to need. Only 3% of individuals expressed their most recent  
39 expectation 8 years prior to need.  
40  
41  
42  
43  
44  
45  
46  
47  
48  
49  
50  
51  
52  
53  
54  
55  
56  
57  
58  
59  
60

1  
2  
3  
4  
5  
6  
7  
8  
9  
10  
11  
12  
13  
14  
15  
16  
17  
18  
19  
20  
21  
22  
23  
24  
25  
26  
27  
28  
29  
30  
31  
32  
33  
34  
35  
36  
37  
38  
39  
40  
41  
42  
43  
44  
45  
46  
47  
48  
49  
50  
51  
52  
53  
54  
55  
56  
57  
58  
59  
60

Expectations of care were unmet for almost one-third (32%) of respondents who expressed an expectation of caregiving during an interview prior to developing a caregiving need. Among those whose caregiving expectations went unmet (n=427) 37% received only paid assistance, 33% received informal care from someone other than the expected caregiver, and 30% were not receiving needed care. Unmet expectations were associated with being unmarried, older, and having a higher number of ADL deficits. Unmet expectations were also associated with very high and very low self-rated health. Self-rated health had a quadratic relationship with met expectations; those in the middle (fair, good) had the highest rate of met expectations, while those with the lowest (poor) and highest (very good) were less likely to have their expectations met. The influence of cognitive impairment on unmet expectations became non-significant when number of ADL deficits was accounted for in the model. The interaction between gender and marital status was significant, meaning that married males had a significantly greater chance of having caregiving expectations met, and married females were more likely to have unmet expectations. Number of living children, race, income and the presence of LTC insurance coverage were non-significant predictors of having caregiving expectations which go unmet. Model results are displayed in Table 2.

#### *Change Models*

Change in a number of predictor variables influenced the likelihood of unmet expectations. The more years that had passed between the expressed expectation and onset of caregiving need (change in respondent age), change in marital status from married to unmarried (divorce or death of spouse), and remaining unmarried (in comparison to remaining married) were associated with an increased likelihood of

1  
2  
3 unmet expectations. Magnitude of change in self-rated health (positive or negative) was  
4 associated with a decreased likelihood of unmet expectations. There was a significant  
5  
6 associated with a decreased likelihood of unmet expectations. There was a significant  
7  
8 interaction between female gender and change in marital status, meaning that females  
9  
10 were more strongly affected by either becoming or remaining unmarried. Race, gender  
11  
12 and ADL's at caregiving onset were entered into the model as control variables despite  
13  
14 their static nature. Changes in cognition, loss of income, and loss of LTC insurance  
15  
16 were nonsignificant. Model results are displayed in Table 3.  
17  
18

## 19 Discussion

20  
21  
22 Aging adults are likely to expect informal care from a family member, potentially  
23  
24 to the detriment of their motivation to plan for formal care services. A critical barrier to  
25  
26 effectively planning for LTC needs has been the gap in knowledge surrounding factors  
27  
28 that influence the likelihood that expected informal care will be or will not be received.  
29  
30 The findings from this analysis have important application in the development of LTC  
31  
32 planning interventions that are realistic and reflect the situational context of individuals  
33  
34 and families.  
35  
36

37  
38  
39 Americans have a documented under-estimation of their future need for care and  
40  
41 the resources that will be available to meet those needs. Over-expectation of care from  
42  
43 friends and family members puts individuals at risk. Although a third of respondents with  
44  
45 unmet expectations were receiving informal care from an unexpected source, disrupted  
46  
47 care expectations may have negative emotional and interpersonal consequences that  
48  
49 would benefit from future exploration.<sup>13</sup> Individuals may suffer emotional upset when  
50  
51 loved ones fail to meet internalized expectations of care. Thirty percent of our sample  
52  
53 for whom expectations of care were unmet were living without necessary care. Paid,  
54  
55  
56  
57  
58  
59  
60

1  
2  
3 formal care may have been unavailable, unaffordable or of poor quality. When needed  
4 care is not delivered an individual is at significantly increased risk for emergency  
5  
6 department utilization for falls and injuries, hospitalization, early mortality, poor quality of  
7  
8 life and general health decline.<sup>15-18</sup> Realistic expectations regarding the need for future  
9  
10 care and the source of that needed care is vital for personal health.  
11  
12  
13

14  
15 The onset of caregiving need is a critical hinge in an individual's LTC needs  
16 trajectory. Persons who are older and highly ADL dependent may overwhelm the  
17 capacity of the expected caregiver, resulting in use of paid or institutional services.  
18  
19 When expectations of care are unmet the impact goes beyond the individual and their  
20 informal caregivers and extends to financially-limited public care delivery and payment  
21 systems. Long-term care expenses are a leading source of catastrophic medical costs  
22 that can result in the exhaustion of personal resources and reliance upon public  
23 financing (primarily Medicaid) for care.<sup>8</sup> Rates of personal protection through the  
24 purchase of long-term care insurance are relatively low and have been projected to  
25 become even lower. It is estimated that only 11-14% of Americans over age 65 have  
26 LTC insurance coverage.<sup>2, 7, 19</sup>  
27  
28  
29  
30  
31  
32  
33  
34  
35  
36  
37  
38  
39  
40

41 Prior to this study what remained unclear was the predictive validity of individual  
42 expectations on actual receipt of care when need arises. It was found that expectations  
43 often went unmet, and that those most at risk to be underprepared for LTC needs  
44 (older, more disabled) were most likely to have unmet caregiving expectations.  
45  
46 Disturbingly, almost a third (30%) of those with unmet needs reported receiving no care,  
47 this despite noting the need for human assistance at the time of interview. As public  
48 policy moves toward community care and avoidance of nursing home placement, more  
49  
50  
51  
52  
53  
54  
55  
56  
57  
58  
59  
60

1  
2  
3 investigation into the services needed to support expectations of informal care are  
4 warranted.  
5  
6

7  
8 There are a number of limitations to this analysis, and the literature surrounding  
9 expectations of LTC would benefit from future studies that address these limitations.  
10  
11 First, the HRS relies on respondent self-report information, and analyses were limited  
12 by the lack of availability of necessary variables in more recent survey years. Available  
13 data did not allow for a deeper exploration into the psycho-social effects of unmet  
14 expectations, the reasons why care needs were not met when expectations failed, or  
15 the individual response to those unmet needs and expectations. It should also be noted  
16 that individuals with advanced or severe dementia were likely non-responders to the  
17 survey and were less likely to be included in the sample.  
18  
19  
20  
21  
22  
23  
24  
25  
26  
27  
28

29 Qualitative exploration into the context through which expectations develop and  
30 become realized would enhance these findings. Additionally, future research would  
31 benefit from examining the adverse healthcare utilization consequences of unmet  
32 caregiving expectations and what strategies are pursued to access care by individuals  
33 when expectations of care are unrealized. Understanding utilization patterns (hospital,  
34 nursing home, home and community-based care) that result from unmet caregiving  
35 expectations could provide clinicians with evidence about the relative importance of  
36 targeting LTC planning interventions toward those most vulnerable, and inform resource  
37 planning among policy makers.  
38  
39  
40  
41  
42  
43  
44  
45  
46  
47  
48  
49  
50  
51  
52  
53  
54  
55  
56  
57  
58  
59  
60

## Conclusion

This study provides evidence that many older adults are unprepared for the onset of caregiving needs and would benefit from evidence-based planning by professionals. Knowing the likelihood that expected care will be received promotes the ability for professionals to provide realistic, evidence-based care-planning that potentially extends the functional capacity and quality of life for aged Americans and their caregivers. The United States currently lacks a comprehensive plan to address the LTC needs of the aging population. Understanding the frequency and influences of unmet caregiving expectations provides needed information to link expectations to reality, and can be used to inform innovative solutions to care provision for the upcoming cohort of aged Americans.

## List of Abbreviations

LTC= Long Term Care

HRS= Health and Retirement Study

LTSS= Long Term Services and Supports

## Declarations

Ethics and Consent Statement: This analysis utilized only de-identified secondary data and was approved as Exempt by the IRB of author institution.

Conflict of Interests: The authors declare they have no conflict of interests.

Author Contribution: KA, ZH and LS each made substantial contribution to the development of the research questions and the design of the analysis. KA, ZH and LS

1  
2  
3 each contributed to the drafting and revision of this manuscript; each have given final  
4 approval for the manuscript and are accountable for this work.  
5  
6

7  
8 Availability of data and materials: The data for this work is publically available.  
9

10 Funding statement: This research received no specific grant from any funding agency in  
11 the public, commercial or not-for-profit sectors.  
12  
13  
14  
15  
16  
17  
18  
19  
20  
21  
22  
23  
24  
25  
26  
27  
28  
29  
30  
31  
32  
33  
34  
35  
36  
37  
38  
39  
40  
41  
42  
43  
44  
45  
46  
47  
48  
49  
50  
51  
52  
53  
54  
55  
56  
57  
58  
59  
60

For peer review only



## References

1. Henning-Smith CE, Shippee TP. Expectations about future use of long-term services and supports vary by current living arrangement. *Health aff(Millwood)*. 2015;34(1):39-47.
2. Johnson R, Toohey D, Wiener J. Meeting the long-term care needs of baby boomers: how changing families will affect paid helpers and institutions [Internet]. Washington (DC): The Urban Institute; 2007 May [cited 2016 Jan 23]. Available from: <http://www.urban.org/sites/default/files/alfresco/publication-pdfs/311451-Meeting-the-Long-Term-Care-Needs-of-the-Baby-Boomers.PDF>.
3. Martin LG, Freedman VA, Schoeni RF, Andreski PM. Trends in disability and related chronic conditions among people ages fifty to sixty-four. *Health aff (Millwood)*. 2010;29(4):725-31.
4. Brown JR, Goda GS, McGarry K. Long-term care insurance demand limited by beliefs about needs, concerns about insurers, and care available from family. *Health aff (Millwood)*. 2012;31(6):1294-302.
5. Robison J, Shugrue N, Fortinsky RH, Gruman C. Long-term supports and services planning for the future: implications from a statewide survey of Baby Boomers and older adults. *Gerontologist*. 2014;54(2):297-313.
6. Friedemann ML, Newman FL, Seff LR, Dunlop BD. Planning for long-term care: concept, definition, and measurement. *Gerontologist*. 2004;44(4):520-30.
7. Spillman BC. Financial preparedness for long term care needs in old age. In: Lamdin D, editor. *Consumer Knowledge and Financial Decisions: Lifespan Perspectives*. New York: Springer-Verlag; 2012.

- 1  
2  
3 8. Redfoot D, Feinberg L, Houser A. The aging of the baby boom and a growing  
4 care gap: a look at future declines in the availability of family caregivers  
5  
6 [Internet]. Washington (DC): AARP; 2013 Aug [cited 2016 Jan 23]; (85).  
7  
8 Available from:  
9  
10 [http://www.aarp.org/content/dam/aarp/research/public\\_policy\\_institute/ltc/2013/b](http://www.aarp.org/content/dam/aarp/research/public_policy_institute/ltc/2013/baby-boom-and-the-growing-care-gap-insight-AARP-ppi-ltc.pdf)  
11  
12 [aby-boom-and-the-growing-care-gap-insight-AARP-ppi-ltc.pdf](http://www.aarp.org/content/dam/aarp/research/public_policy_institute/ltc/2013/baby-boom-and-the-growing-care-gap-insight-AARP-ppi-ltc.pdf).  
13  
14
- 15 9. Spillman BC, Pezzin LE. Potential and active family caregivers: changing  
16 networks and the "sandwich generation". *The Milbank quarterly*. 2000;78(3):347-  
17 74, table of contents.  
18
- 19 10. Feinberg L, Reinhard S, Houser A, Choula R. Valuing the Invaluable 2011  
20 Update: the growing contributions and costs of family caregiving [Internet].  
21 Washington (DC): AARP Public Policy Institute; 2011 Jun [cited 2016 Jan 23];  
22 (51). Available from: <https://assets.aarp.org/rgcenter/ppi/ltc/i51-caregiving.pdf>.  
23  
24
- 25 11. Kaye HS, Harrington C, LaPlante MP. Long-term care: who gets it, who provides  
26 it, who pays, and how much? *Health aff (Millwood)*. 2010;29(1):11-21.  
27  
28
- 29 12. Pillemer K, Suitor JJ. Who provides care? A prospective study of caregiving  
30 among adult siblings. *Gerontologist*. 2014;54(4):589-98.  
31  
32
- 33 13. Suitor JJ, Gilligan M, Pillemer K, Pruchno R. The role of violated caregiver  
34 preferences in psychological well-being when older mothers need assistance.  
35  
36 *Gerontologist*. 2013;53(3):388-96.  
37  
38
- 39 14. Andersen, R., & Newman, J. Societal and individual determinants of  
40 medical care utilization in the United States. *The Millbank Quarterly*. 2005: 83(4),  
41 1-28.  
42  
43  
44  
45  
46  
47  
48  
49  
50  
51  
52  
53  
54  
55  
56  
57  
58  
59  
60

- 1  
2  
3 15. Hass Z, DePalma G, Craig BA, Xu H, Sands LP. Unmet Need for Help With  
4  
5  
6  
7  
8  
9  
10  
11  
12  
13  
14  
15  
16  
17  
18  
19  
20  
21  
22  
23  
24  
25  
26  
27  
28  
29  
30  
31  
32  
33  
34  
35  
36  
37  
38  
39  
40  
41  
42  
43  
44  
45  
46  
47  
48  
49  
50  
51  
52  
53  
54  
55  
56  
57  
58  
59  
60  
15. Hass Z, DePalma G, Craig BA, Xu H, Sands LP. Unmet Need for Help With  
Activities of Daily Living Disabilities and Emergency Department Admissions  
Among Older Medicare Recipients. *Gerontologist*. 2015.
16. He S, Craig BA, Xu H, Covinsky KE, Stallard E, Thomas J et al. Unmet Need for  
ADL Assistance Is Associated With Mortality Among Older Adults With Mild  
Disability. *J Gerontol A Biol Sci Med Sci*. 2015;70(9):1128-32.
17. Sands LP, Wang Y, McCabe GP, Jennings K, Eng C, Covinsky KE. Rates of  
acute care admissions for frail older people living with met versus unmet activity  
of daily living needs. *J Am Geriatr Soc*. 2006;54(2):339-44.
18. Xu H, Covinsky KE, Stallard E, Thomas J, Sands LP. Insufficient help for activity  
of daily living disabilities and risk of all-cause hospitalization. *J Am Geriatr Soc*.  
2012;60(5):927-33.
19. Cohen M, Sperka S, Forte P, Senkewicz M. Private long term care insurance:  
where is the market headed? [Internet]. Washington (DC): National Health Policy  
Forum; 2011 Apr [cited 2016 Jan 23]. Available from:  
[http://www.nhpf.org/library/forum-sessions/FS\\_04-15-11\\_PrivateLTCl.pdf](http://www.nhpf.org/library/forum-sessions/FS_04-15-11_PrivateLTCl.pdf).

**Table 1. Baseline Characteristics of Analytic Sample (n=1, 352)**

| <b>Variable</b>    | <b>Mean</b> | <b>Range</b>              |
|--------------------|-------------|---------------------------|
| Age                | 81          | 67-104                    |
| Living Children    | 3.5         | 0-20                      |
| Self-Rated Health  | 3 (Fair)    | 1-5 (Poor-Excellent)      |
| Cognitive Score    | 9           | 0-10 (higher more intact) |
| Household Income   | \$38,390    | 0-\$726,768               |
| ADLs at Onset      | 2           | 1-6                       |
| Education in Years | 11.39       | 0-17                      |
| LTC Insurance      | 11%         |                           |
| Married            | 63%         |                           |
| Female             | 61%         |                           |
| White Race         | 82%         |                           |

**Table 2. Predictor Variables at Baseline and Likelihood for Met Expectations****(n=1,352)**

| Variable                            | Estimate | P-Value | Odds Ratio             | 95% CL                 |                        |
|-------------------------------------|----------|---------|------------------------|------------------------|------------------------|
|                                     |          |         |                        | Lower                  | Upper                  |
| Intercept                           | 5.2807   | <.0001  |                        |                        |                        |
| Age                                 | -0.0690  | <.0001  | 0.933                  | 0.916                  | 0.951                  |
| Living Child                        | -0.0974  | 0.4029  | 0.907                  | 0.521                  | 1.299                  |
| Self-Rate Health                    | 0.8511   | 0.0062  |                        |                        |                        |
| Self-Rate Health <sup>squared</sup> | -0.1460  | 0.0029  |                        |                        |                        |
| Cognitive Score                     | 0.0351   | 0.4133  | 1.036                  | 0.952                  | 1.126                  |
| Above Average Income                | 0.2312   | 0.1669  | 1.260                  | 0.908                  | 1.749                  |
| ADLs at Onset                       | -0.2707  | <.0001  | 0.763                  | 0.707                  | 0.824                  |
| LTC Insurance                       | -0.0356  | 0.7328  | 0.965                  | 0.619                  | 1.402                  |
| Married                             | 0.5619   | <.0001  | 3.077 <sup>+</sup>     | 1.866 <sup>+</sup>     | 5.072 <sup>+</sup>     |
| Female                              | 0.0099   | 0.9468  | 1.916 <sup>&amp;</sup> | 1.181 <sup>&amp;</sup> | 3.108 <sup>&amp;</sup> |
| Female*Married                      | -0.6402  | <.0001  | 0.855 <sup>#</sup>     | 0.613 <sup>#</sup>     | 1.193 <sup>#</sup>     |
| White Race                          | 0.1283   | 0.1410  | 1.137                  | 0.918                  | 1.819                  |
| Education in Years                  | 0.0137   | 0.5046  | 1.014                  | 0.974                  | 1.056                  |

+ Odds ratio of married vs unmarried for males. & Odds ratio of female vs male for unmarried. # Odds ratio of married vs unmarried for females.

**Table 3. Change in Predictor Variables and Likelihood for Met Expectations****(n=1,352)**

|                                 | Estimate | P-Value | Odds Ratio             | 95% CL<br>Lower<br>Bound | 95 % CI<br>Upper<br>Bound |
|---------------------------------|----------|---------|------------------------|--------------------------|---------------------------|
| Intercept                       | 2.1305   | <.0001  |                        |                          |                           |
| Age Increase (Years)            | -0.1075  | 0.0005  | 0.898                  | 0.846                    | 0.954                     |
| Living Child                    | -0.1195  | 0.6091  | 0.887                  | 0.561                    | 1.403                     |
| Self-Rated Health Change        | 0.2756   | <.0001  | 1.317                  | 1.169                    | 1.485                     |
| Cognitive Score Change          | -0.0479  | 0.2131  | 0.953                  | 0.884                    | 1.028                     |
| Lost 10% or more of Income      | -0.0735  | 0.7485  | 0.929                  | 0.593                    | 1.456                     |
| ADLs at Onset                   | -0.3034  | <.0001  | 0.738                  | 0.682                    | 0.799                     |
| No longer has LTC Insurance     | 1.0224   | 0.0776  | 2.780                  | 0.893                    | 8.652                     |
| New LTC Insurance               | 0.3986   | 0.457   | 1.499                  | 0.524                    | 4.286                     |
| Continued without LTC Insurance | 0.2591   | 0.2566  | 1.296                  | 0.828                    | 2.028                     |
| No Longer Married               | -2.8181  | <.0001  | 0.060 <sup>+</sup>     | 0.025 <sup>+</sup>       | 0.141 <sup>+</sup>        |
| Continued as Unmarried          | -1.5658  | <.0001  | 0.209 <sup>#</sup>     | 0.125 <sup>#</sup>       | 0.350 <sup>#</sup>        |
| Female                          | -0.5588  | 0.0043  | 0.572 <sup>&amp;</sup> | 0.390 <sup>&amp;</sup>   | 0.839 <sup>&amp;</sup>    |
| Female*No Longer Married        | 1.5832   | 0.0019  | 0.291 <sup>++</sup>    | 0.173 <sup>++</sup>      | 0.490 <sup>++</sup>       |
| Female*Continued as Unmarried   | 1.0948   | 0.0005  | 0.624 <sup>##</sup>    | 0.441 <sup>##</sup>      | 0.883 <sup>##</sup>       |
| White Race                      | 0.1355   | 0.4252  | 1.145                  | 0.821                    | 1.598                     |
| Education in Years              | 0.0257   | 0.1803  | 1.026                  | 0.988                    | 1.065                     |

+ No longer married vs still married for males. # Still unmarried vs still married for males. & Female vs male for still married. ++ No longer married vs still married for females. ## Still unmarried vs still married for females.

STROBE Statement—Checklist of items that should be included in reports of *cross-sectional studies*

|                              | Item No | Recommendation                                                                                                                                                                                                                                                                                                                                                                                                |
|------------------------------|---------|---------------------------------------------------------------------------------------------------------------------------------------------------------------------------------------------------------------------------------------------------------------------------------------------------------------------------------------------------------------------------------------------------------------|
| <b>Title and abstract</b>    | 1       | (a) Indicate the study's design with a commonly used term in the title or the abstract<br>(b) Provide in the abstract an informative and balanced summary of what was done and what was found                                                                                                                                                                                                                 |
| <b>Introduction</b>          |         |                                                                                                                                                                                                                                                                                                                                                                                                               |
| Background/rationale         | 2       | Explain the scientific background and rationale for the investigation being reported                                                                                                                                                                                                                                                                                                                          |
| Objectives                   | 3       | State specific objectives, including any prespecified hypotheses                                                                                                                                                                                                                                                                                                                                              |
| <b>Methods</b>               |         |                                                                                                                                                                                                                                                                                                                                                                                                               |
| Study design                 | 4       | Present key elements of study design early in the paper                                                                                                                                                                                                                                                                                                                                                       |
| Setting                      | 5       | Describe the setting, locations, and relevant dates, including periods of recruitment, exposure, follow-up, and data collection                                                                                                                                                                                                                                                                               |
| Participants                 | 6       | (a) Give the eligibility criteria, and the sources and methods of selection of participants                                                                                                                                                                                                                                                                                                                   |
| Variables                    | 7       | Clearly define all outcomes, exposures, predictors, potential confounders, and effect modifiers. Give diagnostic criteria, if applicable                                                                                                                                                                                                                                                                      |
| Data sources/<br>measurement | 8*      | For each variable of interest, give sources of data and details of methods of assessment (measurement). Describe comparability of assessment methods if there is more than one group                                                                                                                                                                                                                          |
| Bias                         | 9       | Describe any efforts to address potential sources of bias                                                                                                                                                                                                                                                                                                                                                     |
| Study size                   | 10      | Explain how the study size was arrived at                                                                                                                                                                                                                                                                                                                                                                     |
| Quantitative variables       | 11      | Explain how quantitative variables were handled in the analyses. If applicable, describe which groupings were chosen and why                                                                                                                                                                                                                                                                                  |
| Statistical methods          | 12      | (a) Describe all statistical methods, including those used to control for confounding<br>(b) Describe any methods used to examine subgroups and interactions<br>(c) Explain how missing data were addressed<br>(d) If applicable, describe analytical methods taking account of sampling strategy<br>(e) Describe any sensitivity analyses                                                                    |
| <b>Results</b>               |         |                                                                                                                                                                                                                                                                                                                                                                                                               |
| Participants                 | 13*     | (a) Report numbers of individuals at each stage of study—eg numbers potentially eligible, examined for eligibility, confirmed eligible, included in the study, completing follow-up, and analysed<br>(b) Give reasons for non-participation at each stage<br>(c) Consider use of a flow diagram                                                                                                               |
| Descriptive data             | 14*     | (a) Give characteristics of study participants (eg demographic, clinical, social) and information on exposures and potential confounders<br>(b) Indicate number of participants with missing data for each variable of interest                                                                                                                                                                               |
| Outcome data                 | 15*     | Report numbers of outcome events or summary measures                                                                                                                                                                                                                                                                                                                                                          |
| Main results                 | 16      | (a) Give unadjusted estimates and, if applicable, confounder-adjusted estimates and their precision (eg, 95% confidence interval). Make clear which confounders were adjusted for and why they were included<br>(b) Report category boundaries when continuous variables were categorized<br>(c) If relevant, consider translating estimates of relative risk into absolute risk for a meaningful time period |
| Other analyses               | 17      | Report other analyses done—eg analyses of subgroups and interactions, and sensitivity analyses                                                                                                                                                                                                                                                                                                                |

| <b>Discussion</b>        |    |                                                                                                                                                                            |
|--------------------------|----|----------------------------------------------------------------------------------------------------------------------------------------------------------------------------|
| Key results              | 18 | Summarise key results with reference to study objectives                                                                                                                   |
| Limitations              | 19 | Discuss limitations of the study, taking into account sources of potential bias or imprecision. Discuss both direction and magnitude of any potential bias                 |
| Interpretation           | 20 | Give a cautious overall interpretation of results considering objectives, limitations, multiplicity of analyses, results from similar studies, and other relevant evidence |
| Generalisability         | 21 | Discuss the generalisability (external validity) of the study results                                                                                                      |
| <b>Other information</b> |    |                                                                                                                                                                            |
| Funding                  | 22 | Give the source of funding and the role of the funders for the present study and, if applicable, for the original study on which the present article is based              |

\*Give information separately for exposed and unexposed groups.

**Note:** An Explanation and Elaboration article discusses each checklist item and gives methodological background and published examples of transparent reporting. The STROBE checklist is best used in conjunction with this article (freely available on the Web sites of PLoS Medicine at <http://www.plosmedicine.org/>, Annals of Internal Medicine at <http://www.annals.org/>, and Epidemiology at <http://www.epidem.com/>). Information on the STROBE Initiative is available at [www.strobe-statement.org](http://www.strobe-statement.org).



# BMJ Open

## Likelihood that Expectations of Informal Care will be Met at Onset of Caregiving Need: A Retrospective Study of Older Adults in the United States

|                                 |                                                                                                                                                                                 |
|---------------------------------|---------------------------------------------------------------------------------------------------------------------------------------------------------------------------------|
| Journal:                        | <i>BMJ Open</i>                                                                                                                                                                 |
| Manuscript ID                   | bmjopen-2017-017791.R1                                                                                                                                                          |
| Article Type:                   | Research                                                                                                                                                                        |
| Date Submitted by the Author:   | 15-Oct-2017                                                                                                                                                                     |
| Complete List of Authors:       | Abrahamson, Kathleen; Purdue University College of Health and Human Sciences, Hass, Zachary; Purdue University College of Health and Human Sciences Sands, Laura; Virginia Tech |
| <b>Primary Subject Heading</b>: | Geriatric medicine                                                                                                                                                              |
| Secondary Subject Heading:      | Health services research                                                                                                                                                        |
| Keywords:                       | caregiving, long term care, expectations of care                                                                                                                                |
|                                 |                                                                                                                                                                                 |

SCHOLARONE™  
Manuscripts

1  
2  
3  
4  
5  
6  
7  
8  
9  
10  
11  
12  
13  
14  
15  
16  
17  
18  
19  
20  
21  
22  
23  
24  
25  
26  
27  
28  
29  
30  
31  
32  
33  
34  
35  
36  
37  
38  
39  
40  
41  
42  
43  
44  
45  
46  
47  
48  
49  
50  
51  
52  
53  
54  
55  
56  
57  
58  
59  
60

Likelihood that Expectations of Informal Care will be Met at Onset of  
Caregiving Need: a retrospective study of older adults in the United  
States

Kathleen Abrahamson, PhD, RN

Assistant Professor, Purdue University School of Nursing

502 N. University Street

West Lafayette, IN 47907

765-494-4019

[kaabraha@purdue.edu](mailto:kaabraha@purdue.edu)

Zachary Hass, MS

Purdue University

[zhass@purdue.edu](mailto:zhass@purdue.edu)

Laura Sands, PhD

Virginia Polytechnic Institute and State University

[lsands@exchange.vt.edu](mailto:lsands@exchange.vt.edu)

**Abstract:**

Aging adults are likely to expect informal caregiving assistance from a friend or family member, reflecting the reality that most long term care (LTC) is provided by family and friends. The purpose of the study was to determine the likelihood that expectations of care will be unmet at the onset of functional disability, and factors that impact that likelihood.

**Methods:** Community dwelling respondents from bi-annual repeated assessments (2006-2010) of the Health and Retirement Study (HRS) over age 65 who expressed a caregiving expectation prior to need were included in the final analytic sample (n=1,352). Logistic regression and change models were specified to address impact of variables on unmet expectations.

**Results:** Expectations of care were unmet for almost one-third (32%) of the sample, among whom 30% were not receiving needed care. Unmet expectations were associated with being unmarried, older, and having a higher number of ADL deficits. Change over time in a number of predictor variables influenced the likelihood of unmet expectations.

**Conclusions:** Unplanned dependence on formal care systems and/or having unmet care needs places elders at risk of negative outcomes. Knowledge of factors that impact whether expected care is eventually received provides robust evidence for counseling individuals regarding the need to plan for additional LTC services.

## Strengths and Weaknesses of the Study

- Use of a large, representative data set allows for testing of the predictive value of personal expectations on likelihood that expected care will be received, a novel question that can inform personal discussions and policy decisions.
- The complex details surrounding care giving decisions are not available in this data, and future research would benefit from qualitative work which supplements these findings.
- It is not clear whether those who did not receive care from the expected source but are receiving adequate care are satisfied with their informal caregiving arrangement; a significant limitation to the meaningful application of these findings.

## Background

The majority of Americans underestimate their future need for long term services and supports (LTSS).<sup>1</sup> Between 2010 and 2040 the number of Americans needing LTSS is projected to more than double to over 40 million,<sup>2</sup> and this may be an underestimate given current levels of disability risk among the middle aged and young-old.<sup>3</sup> Yet studies have shown that a sizeable proportion of Americans do not believe they will need LTSS in the future.<sup>1, 4, 5</sup> The majority of Americans have not adequately planned for future LTSS needs.<sup>6, 7</sup> Planning in the absence of crisis is rare, and many Americans erroneously perceive that Medicare or other public funds are readily available to assist with LTSS financing. Robison et al. found that 31% of surveyed middle-aged and older adults had no plans to finance their LTSS needs, 45% planned to rely on Medicare (which only funds limited post-acute or skilled nursing services), and

1  
2  
3 yet 90% planned to remain in their own home. Underestimation of future LTSS needs  
4  
5 and overestimation of LTSS financing options, combined with little individual planning  
6  
7  
8 for LTSS leaves individuals at risk for unmet care needs and poor personal outcomes.  
9

10 The number of Americans with LTC needs is large and expanding rapidly at a  
11  
12 time in United States history when access to trained caregiving personnel and public  
13  
14 financial resources are diminishing. Demands of friends and family to provide LTC are  
15  
16 common and will invariably increase in relation to predicted demographic and economic  
17  
18 trends.<sup>8,9</sup> The Caregiver Support Ratio, defined as the number of adults aged 45-64  
19  
20 available to care for each person aged 80 and over is expected to decrease from 7:1 in  
21  
22 2010 to 4:1 in 2030 and 3:1 in 2050.<sup>8</sup> Informal caregivers are often unprepared or  
23  
24 unavailable to provide care, leaving an individual to become dependent upon paid  
25  
26 (formal) care services or face unmet care needs.<sup>10, 11</sup>  
27  
28  
29  
30  
31

32 Despite the lack of overt planning for LTSS needs, people have expectations  
33  
34 regarding living arrangements and caregiving when a need arises. Henning-Smith and  
35  
36 Shippee (2015) found that 73% of respondents to the National Health Interview Survey  
37  
38 expected a family member to provide care, a significantly higher number of respondents  
39  
40 than those who expected to rely upon professional services or paid care for assistance.  
41  
42 Research has also demonstrated that persons who expect to receive care from a family  
43  
44 member are less likely to purchase long term care insurance, placing them at risk if the  
45  
46 expected informal care is not provided.<sup>4</sup>  
47  
48  
49

50 Previous researchers have shown that the parental expectations that a child will  
51  
52 become their caregiver significantly predict selection of that particular child as caregiver  
53  
54 amongst other siblings.<sup>12</sup> Available literature also shows that mothers demonstrate  
55  
56  
57  
58  
59  
60

1  
2  
3 negative responses when caregiver preferences are unmet.<sup>13</sup> As of yet, the frequency  
4 that expectations of informal care from any source will be met or unmet when need  
5 arises is unknown. It is also unclear what factors influence the likelihood that  
6 expectations for care will be met among a representative sample of older Americans.  
7  
8 The current analyses address those gaps by using a large, nationally representative  
9 sample that expressed an expectation for care and later developed a caregiving need to  
10 answer the following research questions:  
11  
12

- 13 1. How often were caregiving expectations expressed *prior* to disability onset met at the  
14 time of caregiving need?
- 15 2. What individual and situational factors influenced that likelihood that expectations of  
16 care were met?

## 17 18 19 20 21 22 23 24 25 26 27 28 29 **Design and Methods**

30  
31 Data for this study were taken from bi-annual repeated assessments (2002-2010)  
32 of the Health and Retirement Study (HRS). The HRS is sponsored by the National  
33 Institute on Aging (grant number NIA U01AG009740) and is conducted by the University  
34 of Michigan. It is a longitudinal study of a representative sample of about 20,000  
35 Americans over the age of 50. Use of this data was approved by the Institutional Review  
36 Board at the author institution, and authors have no competing interests to declare.  
37  
38 Among large scale studies designed to assess respondents' trajectories toward LTC  
39 needs, the HRS is unique in its inclusion of information about the respondents'  
40 expectations that a specific family member or friend will provide caregiving to the  
41 respondent when needed. Respondents are asked which of their family members or  
42 friends would be willing and able to provide needed help with personal care needs such  
43  
44  
45  
46  
47  
48  
49  
50  
51  
52  
53  
54  
55  
56  
57  
58  
59  
60

1  
2  
3 as eating or dressing. It is assumed in the data that if the respondent has a spouse that  
4  
5 the spouse would be the primary caregiver, but respondents may report additional  
6  
7 potential caregivers allowing for the possibility that a current spouse may not be  
8  
9 available or able to provide caregiving in the future.  
10

### 11 12 *Analytic sample*

13  
14  
15 The sample included all community-dwelling HRS respondents over age 65 in  
16  
17 survey years 2002-2008 who were independent in their ADL tasks in their initial  
18  
19 interview (n=9,546). Respondents who completed the initial interview by proxy and  
20  
21 therefore did not express an expected caregiver were not included in the sample. Of  
22  
23 those 9,546 respondents, 1,670 (17%) developed an ADL deficit (dressing, walking,  
24  
25 transfer mobility, bathing, eating or toileting) that required human help at a data  
26  
27 collection point after their initial interview. Among those who developed a caregiving  
28  
29 need, 1,352 had expressed an expectation of care from a named friend or family  
30  
31 member prior to the need for care. Only those respondents who expressed a caregiving  
32  
33 expectation prior to need were included in the final analytic sample (n=1,352). To  
34  
35 address the proposed research objectives, only respondents who expressed a  
36  
37 caregiving expectation and later developed a caregiving need were included in the  
38  
39 analysis. Characteristics of the analytic sample are displayed in Table 1.  
40  
41  
42  
43  
44

### 45 46 *Measurement and variables*

47  
48 Respondents' informal caregiving expectation was measured by their stated  
49  
50 expectation of care from a named caregiver while still independently performing ADL  
51  
52 tasks (prior to a need for care). An expectation could be stated at each biennial  
53  
54 assessment. Onset of caregiving need was also assessed at each biennial assessment.  
55  
56  
57  
58  
59  
60

1  
2  
3 For each respondent that newly reported the need for caregiving help from another  
4 person it was noted who was providing the needed care. The list of actual caregivers  
5 was then compared by authors to the list of expected caregivers provided by the  
6 respondent at the assessment most proximal and prior to development of the caregiving  
7 need. If the respondent did not report an expectation of informal care in the assessment  
8 just prior to the onset of a caregiving need, the next prior assessment was considered,  
9 and so forth until the expectation most proximal to caregiving onset was identified.  
10  
11  
12  
13  
14  
15  
16  
17  
18  
19

20 The expectation was considered met if the respondent received care from their  
21 spouse or any other named caregiver. Care is defined as personal assistance with any  
22 ADL/IADL need. An expectation was considered unmet if none of the expected  
23 caregivers were actually providing care to the respondent, including situations when the  
24 respondent did not receive any needed care, received care from someone other than a  
25 spouse or expected caregiver, or received only paid care services. Predictor variables  
26 were selected based upon empirical findings from previous research, and were taken  
27 from the HRS survey. Determination of predictor variables was guided by Andersen's  
28 model of health behavior which describes predisposing, enabling, and need  
29 characteristics that influence need for health related services<sup>14</sup>. The variables chosen  
30 include respondent demographic characteristics reflecting predisposing characteristics  
31 that increase need for care (age, race, education); family structure (marital status,  
32 number of living children) and economic predictors reflecting characteristics that enable  
33 acquisition of care (household income, having Long Term Care (LTC) insurance), and  
34 respondent health and functional status reflecting potential need for care (cognitive  
35 score, number of ADL deficits, self-rated health).  
36  
37  
38  
39  
40  
41  
42  
43  
44  
45  
46  
47  
48  
49  
50  
51  
52  
53  
54  
55  
56  
57  
58  
59  
60



## Analysis

A logistic regression model was fit to assess the relationship between the predictor variables and the binary outcome variable of whether or not caregiver expectations were met. A second logistic regression model was fit to assess the relationship between change over time in predictor variables and likelihood of met/unmet expectations. Potential predictor variables were assessed in turn in a simple logistic model and the potential form of their relationship was explored using exploratory data analysis. Potential interactions were also tested. The best form of each predictor (as assessed by ROC area under the curve) was then combined into the full models. A p-value for an estimated effect in the full model below 0.05 was taken to be a statistically significant effect on the log odds of having expectations for care met.

## Results

Of the 1,670 respondents who developed a caregiving need the majority (n=1,352, 81%) had expressed a caregiving expectation prior to onset of need. Adult child or child-in-law was the most frequently reported expected caregiver (48%), followed by spouse (35%). No other expected caregiver to recipient relationship occurred at more than 7% in this sample. Seventy-two percent of caregiving expectations most proximal to the development of a caregiving need were stated at the biennial assessment that occurred two years before the onset of need. For 18% of the analytic sample, the most recent statement of expectations was 4 years prior to caregiving need, and 7% expressed the most recent expectation of informal care was recorded 6 years prior to need. Only 3% of individuals expressed their most recent expectation 8 years prior to need.

1  
2  
3  
4  
5  
6  
7  
8  
9  
10  
11  
12  
13  
14  
15  
16  
17  
18  
19  
20  
21  
22  
23  
24  
25  
26  
27  
28  
29  
30  
31  
32  
33  
34  
35  
36  
37  
38  
39  
40  
41  
42  
43  
44  
45  
46  
47  
48  
49  
50  
51  
52  
53  
54  
55  
56  
57  
58  
59  
60

Expectations of care were unmet for almost one-third (32%) of respondents who expressed an expectation of caregiving during an interview prior to developing a caregiving need. Among those whose caregiving expectations went unmet (n=427) 37% received only paid assistance, 33% received informal care from someone other than the expected caregiver, and 30% were not receiving needed care. The average hours of help per day by caregiving status were 7.8 hours for those with unmet expectations, 7.2 hours for those with met expectations, and 6.9 hours of care received from the expected caregiver. Unmet expectations were associated with being unmarried, older, and having a higher number of ADL deficits. Unmet expectations were also associated with very high and very low self-rated health. Self-rated health had a quadratic relationship with met expectations; those in the middle (fair, good) had the highest rate of met expectations, while those with the lowest (poor) and highest (very good) were less likely to have their expectations met. The influence of cognitive impairment on unmet expectations became non-significant when number of ADL deficits was accounted for in the model. The interaction between gender and marital status was significant, meaning that married males had a significantly greater chance of having caregiving expectations met, and married females were more likely to have unmet expectations. Number of living children, race, income and the presence of LTC insurance coverage were non-significant predictors of having caregiving expectations which go unmet. Model results are displayed in Table 2.

### *Change Models*

Change in a number of predictor variables influenced the likelihood of unmet expectations. The more years that had passed between the expressed expectation and

1  
2  
3 onset of caregiving need (change in respondent age), change in marital status from  
4 married to unmarried (divorce or death of spouse), and remaining unmarried (in  
5 comparison to remaining married) were associated with an increased likelihood of  
6 unmet expectations. Magnitude of change in self-rated health (positive or negative) was  
7 associated with a decreased likelihood of unmet expectations. There was a significant  
8 interaction between female gender and change in marital status, meaning that females  
9 were more strongly affected by either becoming or remaining unmarried. Race, gender  
10 and ADL's at caregiving onset were entered into the model as control variables despite  
11 their static nature. Changes in cognition, loss of income, and loss of LTC insurance  
12 were nonsignificant. Model results are displayed in Table 3.  
13  
14  
15  
16  
17  
18  
19  
20  
21  
22  
23  
24  
25  
26

## 27 Discussion

28  
29 Aging adults are likely to expect informal care from a family member, potentially  
30 to the detriment of their motivation to plan for formal care services. A critical barrier to  
31 effectively planning for LTC needs has been the gap in knowledge surrounding factors  
32 that influence the likelihood that expected informal care will be or will not be received.  
33 The findings from this analysis have important application in the development of LTC  
34 planning interventions that are realistic and reflect the situational context of individuals  
35 and families.  
36  
37  
38  
39  
40  
41  
42  
43  
44

45  
46 Americans have a documented under-estimation of their future need for care and  
47 the resources that will be available to meet those needs. Over-expectation of care from  
48 friends and family members puts individuals at risk. Although a third of respondents with  
49 unmet expectations were receiving informal care from an unexpected source, disrupted  
50 care expectations may have negative emotional and interpersonal consequences that  
51  
52  
53  
54  
55  
56  
57  
58  
59  
60

1  
2  
3 would benefit from future exploration.<sup>13</sup> Individuals may suffer emotional upset when  
4 loved ones fail to meet internalized expectations of care. Thirty percent of our sample  
5 for whom expectations of care were unmet were living without necessary care. Paid,  
6 formal care may have been unavailable, unaffordable or of poor quality. When needed  
7 care is not delivered an individual is at significantly increased risk for emergency  
8 department utilization for falls and injuries, hospitalization, early mortality, poor quality of  
9 life and general health decline.<sup>15-18</sup> Realistic expectations regarding the need for future  
10 care and the source of that needed care is vital for personal health.

11  
12  
13  
14  
15  
16  
17  
18  
19  
20  
21  
22 The onset of caregiving need is a critical hinge in an individual's LTC needs  
23 trajectory. Persons who are older and highly ADL dependent may overwhelm the  
24 capacity of the expected caregiver, resulting in use of paid or institutional services.  
25 When expectations of care are unmet the impact goes beyond the individual and their  
26 informal caregivers and extends to financially-limited public care delivery and payment  
27 systems. Long-term care expenses are a leading source of catastrophic medical costs  
28 that can result in the exhaustion of personal resources and reliance upon public  
29 financing (primarily Medicaid) for care.<sup>8</sup> Rates of personal protection through the  
30 purchase of long-term care insurance are relatively low and have been projected to  
31 become even lower. It is estimated that only 11-14% of Americans over age 65 have  
32 LTC insurance coverage.<sup>2, 7, 19</sup>

33  
34  
35  
36  
37  
38  
39  
40  
41  
42  
43  
44  
45  
46  
47  
48 Prior to this study what remained unclear was the predictive validity of individual  
49 expectations on actual receipt of care when need arises. It was found that expectations  
50 often went unmet, and that those most at risk to be underprepared for LTC needs  
51 (older, more disabled) were most likely to have unmet caregiving expectations.

1  
2  
3 Disturbingly, almost a third (30%) of those with unmet needs reported receiving no care,  
4  
5 this despite noting the need for human assistance at the time of interview. As public  
6  
7 policy moves toward community care and avoidance of nursing home placement, more  
8  
9 investigation into the services needed to support expectations of informal care are  
10  
11 warranted.  
12  
13

14  
15 There are a number of limitations to this analysis, and the literature surrounding  
16  
17 expectations of LTC would benefit from future studies that address these limitations.  
18  
19 First, the HRS relies on respondent self-report information, and analyses were limited  
20  
21 by the lack of availability of necessary variables in more recent survey years. Available  
22  
23 data did not allow for a deeper exploration into the psycho-social effects of unmet  
24  
25 expectations, the reasons why care needs were not met when expectations failed, or  
26  
27 the individual response to those unmet needs and expectations. It was also not possible  
28  
29 to examine whether the expected caregiver was providing care via a proxy paid  
30  
31 caregiver, or providing other needed resources to the care recipient apart from direct  
32  
33 assistance with ADL/IADL needs. Caregiver employment or parenthood status were  
34  
35 also not included in the data or in our analyses. It should also be noted that individuals  
36  
37 with advanced or severe dementia were likely non-responders to the survey and were  
38  
39 less likely to be included in the sample.  
40  
41  
42  
43  
44

45  
46 Qualitative exploration into the context through which expectations develop and  
47  
48 become realized would enhance these findings. Additionally, future research would  
49  
50 benefit from examining the adverse healthcare utilization consequences of unmet  
51  
52 caregiving expectations and what strategies are pursued to access care by individuals  
53  
54 when expectations of care are unrealized. Understanding utilization patterns (hospital,  
55  
56  
57  
58  
59  
60

1  
2  
3 nursing home, home and community-based care) that result from unmet caregiving  
4  
5 expectations could provide clinicians with evidence about the relative importance of  
6  
7 targeting LTC planning interventions toward those most vulnerable, and inform resource  
8  
9 planning among policy makers.  
10  
11

## 12 13 14 15 **Conclusion**

16  
17 This study provides evidence that many older adults are unprepared for the onset  
18  
19 of caregiving needs and would benefit from evidence-based planning by professionals.  
20  
21 Knowing the likelihood that expected care will be received promotes the ability for  
22  
23 professionals to provide realistic, evidence-based care-planning that potentially extends  
24  
25 the functional capacity and quality of life for aged Americans and their caregivers. The  
26  
27 United States currently lacks a comprehensive plan to address the LTC needs of the  
28  
29 aging population. Understanding the frequency and influences of unmet caregiving  
30  
31 expectations provides needed information to link expectations to reality, and can be  
32  
33 used to inform innovative solutions to care provision for the upcoming cohort of aged  
34  
35 Americans.  
36  
37  
38  
39  
40  
41  
42

## 43 44 **List of Abbreviations**

45  
46 LTC= Long Term Care

47  
48 HRS= Health and Retirement Study

49  
50 LTSS= Long Term Services and Supports  
51  
52  
53  
54  
55  
56  
57  
58  
59  
60

## Declarations

Ethics and Consent Statement: This analysis utilized only de-identified secondary data and was approved as Exempt by the IRB of author institution.

Conflict of Interests: The authors declare they have no conflict of interests.

Author Contribution: KA, ZH and LS each made substantial contribution to the development of the research questions and the design of the analysis. KA, ZH and LS each contributed to the drafting and revision of this manuscript; each have given final approval for the manuscript and are accountable for this work.

Data sharing statement: The data for this work is publicly available. Information on how to access available data is located at <https://hrs.isr.umich.edu/data-products>.

Funding statement: This research received no specific grant from any funding agency in the public, commercial or not-for-profit sectors.

## References

1. Henning-Smith CE, Shippee TP. Expectations about future use of long-term services and supports vary by current living arrangement. *Health aff(Millwood)*. 2015;34(1):39-47.
2. Johnson R, Toohey D, Wiener J. Meeting the long-term care needs of baby boomers: how changing families will affect paid helpers and institutions [Internet]. Washington (DC): The Urban Institute; 2007 May [cited 2016 Jan 23]. Available from: <http://www.urban.org/sites/default/files/alfresco/publication-pdfs/311451-Meeting-the-Long-Term-Care-Needs-of-the-Baby-Boomers.PDF>.
3. Martin LG, Freedman VA, Schoeni RF, Andreski PM. Trends in disability and related chronic conditions among people ages fifty to sixty-four. *Health aff (Millwood)*. 2010;29(4):725-31.
4. Brown JR, Goda GS, McGarry K. Long-term care insurance demand limited by beliefs about needs, concerns about insurers, and care available from family. *Health aff (Millwood)*. 2012;31(6):1294-302.
5. Robison J, Shugrue N, Fortinsky RH, Gruman C. Long-term supports and services planning for the future: implications from a statewide survey of Baby Boomers and older adults. *Gerontologist*. 2014;54(2):297-313.
6. Friedemann ML, Newman FL, Seff LR, Dunlop BD. Planning for long-term care: concept, definition, and measurement. *Gerontologist*. 2004;44(4):520-30.
7. Spillman BC. Financial preparedness for long term care needs in old age. In: Lamdin D, editor. *Consumer Knowledge and Financial Decisions: Lifespan Perspectives*. New York: Springer-Verlag; 2012.



- 1  
2  
3 8. Redfoot D, Feinberg L, Houser A. The aging of the baby boom and a growing  
4 care gap: a look at future declines in the availability of family caregivers  
5  
6 [Internet]. Washington (DC): AARP; 2013 Aug [cited 2016 Jan 23]; (85).  
7  
8 Available from:  
9  
10 [http://www.aarp.org/content/dam/aarp/research/public\\_policy\\_institute/ltc/2013/b](http://www.aarp.org/content/dam/aarp/research/public_policy_institute/ltc/2013/baby-boom-and-the-growing-care-gap-insight-AARP-ppi-ltc.pdf)  
11  
12 [aby-boom-and-the-growing-care-gap-insight-AARP-ppi-ltc.pdf](http://www.aarp.org/content/dam/aarp/research/public_policy_institute/ltc/2013/baby-boom-and-the-growing-care-gap-insight-AARP-ppi-ltc.pdf).  
13  
14
- 15 9. Spillman BC, Pezzin LE. Potential and active family caregivers: changing  
16 networks and the "sandwich generation". *The Milbank quarterly*. 2000;78(3):347-  
17 74, table of contents.  
18  
19
- 20 10. Feinberg L, Reinhard S, Houser A, Choula R. Valuing the Invaluable 2011  
21 Update: the growing contributions and costs of family caregiving [Internet].  
22 Washington (DC): AARP Public Policy Institute; 2011 Jun [cited 2016 Jan 23];  
23 (51). Available from: <https://assets.aarp.org/rgcenter/ppi/ltc/i51-caregiving.pdf>.  
24  
25
- 26 11. Kaye HS, Harrington C, LaPlante MP. Long-term care: who gets it, who provides  
27 it, who pays, and how much? *Health aff (Millwood)*. 2010;29(1):11-21.  
28  
29
- 30 12. Pillemer K, Suitor JJ. Who provides care? A prospective study of caregiving  
31 among adult siblings. *Gerontologist*. 2014;54(4):589-98.  
32  
33
- 34 13. Suitor JJ, Gilligan M, Pillemer K, Pruchno R. The role of violated caregiver  
35 preferences in psychological well-being when older mothers need assistance.  
36  
37 *Gerontologist*. 2013;53(3):388-96.  
38  
39
- 40 14. Andersen, R., & Newman, J. Societal and individual determinants of  
41 medical care utilization in the United States. *The Millbank Quarterly*. 2005: 83(4),  
42 1-28.  
43  
44  
45  
46  
47  
48  
49  
50  
51  
52  
53  
54  
55  
56  
57  
58  
59  
60

- 1  
2  
3 15. Hass Z, DePalma G, Craig BA, Xu H, Sands LP. Unmet Need for Help With  
4  
5  
6  
7  
8  
9  
10  
11  
12  
13  
14  
15  
16  
17  
18  
19  
20  
21  
22  
23  
24  
25  
26  
27  
28  
29  
30  
31  
32  
33  
34  
35  
36  
37  
38  
39  
40  
41  
42  
43  
44  
45  
46  
47  
48  
49  
50  
51  
52  
53  
54  
55  
56  
57  
58  
59  
60
16. He S, Craig BA, Xu H, Covinsky KE, Stallard E, Thomas J et al. Unmet Need for  
ADL Assistance Is Associated With Mortality Among Older Adults With Mild  
Disability. *J Gerontol A Biol Sci Med Sci*. 2015;70(9):1128-32.
17. Sands LP, Wang Y, McCabe GP, Jennings K, Eng C, Covinsky KE. Rates of  
acute care admissions for frail older people living with met versus unmet activity  
of daily living needs. *J Am Geriatr Soc*. 2006;54(2):339-44.
18. Xu H, Covinsky KE, Stallard E, Thomas J, Sands LP. Insufficient help for activity  
of daily living disabilities and risk of all-cause hospitalization. *J Am Geriatr Soc*.  
2012;60(5):927-33.
19. Cohen M, Sperka S, Forte P, Senkewicz M. Private long term care insurance:  
where is the market headed? [Internet]. Washington (DC): National Health Policy  
Forum; 2011 Apr [cited 2016 Jan 23]. Available from:  
[http://www.nhpf.org/library/forum-sessions/FS\\_04-15-11\\_PrivateLTCl.pdf](http://www.nhpf.org/library/forum-sessions/FS_04-15-11_PrivateLTCl.pdf).

**Table 1. Baseline Characteristics of Analytic Sample (n=1, 352)**

| <i>Variable</i>                  | <i>Mean</i> | <i>Range</i>              |
|----------------------------------|-------------|---------------------------|
| Age                              | 81          | 67-104                    |
| Living Children                  | 3.5         | 0-20                      |
| Self-Rated Health                | 3 (Fair)    | 1-5 (Poor-Excellent)      |
| Cognitive Score                  | 9           | 0-10 (higher more intact) |
| Household Income                 | \$38,390    | 0-\$726,768               |
| Education in Years               | 11.39       | 0-17                      |
| LTC Insurance                    | 11%         |                           |
| Married                          | 63%         |                           |
| Female                           | 61%         |                           |
| White Race                       | 82%         |                           |
| ADLs at Baseline                 | 0           | 0                         |
| ADLs at Onset of Caregiving Need | 2           | 1-6                       |

**Table 2. Predictor Variables at Baseline and Likelihood for Met Expectations****(n=1,352)**

| Variable                            | Estimate | P-Value | Odds Ratio             | 95% CL                 |                        |
|-------------------------------------|----------|---------|------------------------|------------------------|------------------------|
|                                     |          |         |                        | Lower                  | Upper                  |
| Intercept                           | 5.2807   | <.0001  |                        |                        |                        |
| Age                                 | -0.0690  | <.0001  | 0.933                  | 0.916                  | 0.951                  |
| Living Child                        | -0.0974  | 0.4029  | 0.907                  | 0.521                  | 1.299                  |
| Self-Rate Health                    | 0.8511   | 0.0062  |                        |                        |                        |
| Self-Rate Health <sup>squared</sup> | -0.1460  | 0.0029  |                        |                        |                        |
| Cognitive Score                     | 0.0351   | 0.4133  | 1.036                  | 0.952                  | 1.126                  |
| Above Average Income                | 0.2312   | 0.1669  | 1.260                  | 0.908                  | 1.749                  |
| ADLs at Onset                       | -0.2707  | <.0001  | 0.763                  | 0.707                  | 0.824                  |
| LTC Insurance                       | -0.0356  | 0.7328  | 0.965                  | 0.619                  | 1.402                  |
| Married                             | 0.5619   | <.0001  | 3.077 <sup>+</sup>     | 1.866 <sup>+</sup>     | 5.072 <sup>+</sup>     |
| Female                              | 0.0099   | 0.9468  | 1.916 <sup>&amp;</sup> | 1.181 <sup>&amp;</sup> | 3.108 <sup>&amp;</sup> |
| Female*Married                      | -0.6402  | <.0001  | 0.855 <sup>#</sup>     | 0.613 <sup>#</sup>     | 1.193 <sup>#</sup>     |
| White Race                          | 0.1283   | 0.1410  | 1.137                  | 0.918                  | 1.819                  |
| Education in Years                  | 0.0137   | 0.5046  | 1.014                  | 0.974                  | 1.056                  |

+ Odds ratio of married vs unmarried for males. & Odds ratio of female vs male for unmarried. # Odds ratio of married vs unmarried for females.

**Table 3. Change in Predictor Variables and Likelihood for Met Expectations****(n=1,352)**

|                                 | Estimate | P-Value | Odds Ratio             | 95% CL<br>Lower<br>Bound | 95 % CI<br>Upper<br>Bound |
|---------------------------------|----------|---------|------------------------|--------------------------|---------------------------|
| Intercept                       | 2.1305   | <.0001  |                        |                          |                           |
| Age Increase (Years)            | -0.1075  | 0.0005  | 0.898                  | 0.846                    | 0.954                     |
| Living Child                    | -0.1195  | 0.6091  | 0.887                  | 0.561                    | 1.403                     |
| Self-Rated Health Change        | 0.2756   | <.0001  | 1.317                  | 1.169                    | 1.485                     |
| Cognitive Score Change          | -0.0479  | 0.2131  | 0.953                  | 0.884                    | 1.028                     |
| Lost 10% or more of Income      | -0.0735  | 0.7485  | 0.929                  | 0.593                    | 1.456                     |
| ADLs at Onset                   | -0.3034  | <.0001  | 0.738                  | 0.682                    | 0.799                     |
| No longer has LTC Insurance     | 1.0224   | 0.0776  | 2.780                  | 0.893                    | 8.652                     |
| New LTC Insurance               | 0.3986   | 0.457   | 1.499                  | 0.524                    | 4.286                     |
| Continued without LTC Insurance | 0.2591   | 0.2566  | 1.296                  | 0.828                    | 2.028                     |
| No Longer Married               | -2.8181  | <.0001  | 0.060 <sup>+</sup>     | 0.025 <sup>+</sup>       | 0.141 <sup>+</sup>        |
| Continued as Unmarried          | -1.5658  | <.0001  | 0.209 <sup>#</sup>     | 0.125 <sup>#</sup>       | 0.350 <sup>#</sup>        |
| Female                          | -0.5588  | 0.0043  | 0.572 <sup>&amp;</sup> | 0.390 <sup>&amp;</sup>   | 0.839 <sup>&amp;</sup>    |
| Female*No Longer Married        | 1.5832   | 0.0019  | 0.291 <sup>++</sup>    | 0.173 <sup>++</sup>      | 0.490 <sup>++</sup>       |
| Female*Continued as Unmarried   | 1.0948   | 0.0005  | 0.624 <sup>##</sup>    | 0.441 <sup>##</sup>      | 0.883 <sup>##</sup>       |
| White Race                      | 0.1355   | 0.4252  | 1.145                  | 0.821                    | 1.598                     |
| Education in Years              | 0.0257   | 0.1803  | 1.026                  | 0.988                    | 1.065                     |

+ No longer married vs still married for males. # Still unmarried vs still married for males. & Female vs male for still married. ++ No longer married vs still married for females. ## Still unmarried vs still married for females.

STROBE Statement—Checklist of items that should be included in reports of *cross-sectional studies*

|                              | Item No | Recommendation                                                                                                                                                                                                                                                                                                                                                                                                                                                    |
|------------------------------|---------|-------------------------------------------------------------------------------------------------------------------------------------------------------------------------------------------------------------------------------------------------------------------------------------------------------------------------------------------------------------------------------------------------------------------------------------------------------------------|
| <b>Title and abstract</b>    | 1       | (a) Indicate the study's design with a commonly used term in the title or the abstract<br>(b) Provide in the abstract an informative and balanced summary of what was done and what was found P. 1-2 of title pages                                                                                                                                                                                                                                               |
| <b>Introduction</b>          |         |                                                                                                                                                                                                                                                                                                                                                                                                                                                                   |
| Background/rationale         | 2       | Explain the scientific background and rationale for the investigation being reported P. 1-2 of manuscript                                                                                                                                                                                                                                                                                                                                                         |
| Objectives                   | 3       | State specific objectives, including any prespecified hypotheses P. 3                                                                                                                                                                                                                                                                                                                                                                                             |
| <b>Methods</b>               |         |                                                                                                                                                                                                                                                                                                                                                                                                                                                                   |
| Study design                 | 4       | Present key elements of study design early in the paper P.3                                                                                                                                                                                                                                                                                                                                                                                                       |
| Setting                      | 5       | Describe the setting, locations, and relevant dates, including periods of recruitment, exposure, follow-up, and data collection P.3-4                                                                                                                                                                                                                                                                                                                             |
| Participants                 | 6       | (a) Give the eligibility criteria, and the sources and methods of selection of participants P.4                                                                                                                                                                                                                                                                                                                                                                   |
| Variables                    | 7       | Clearly define all outcomes, exposures, predictors, potential confounders, and effect modifiers. Give diagnostic criteria, if applicable P.4-5                                                                                                                                                                                                                                                                                                                    |
| Data sources/<br>measurement | 8*      | For each variable of interest, give sources of data and details of methods of assessment (measurement). Describe comparability of assessment methods if there is more than one group P.4-5                                                                                                                                                                                                                                                                        |
| Bias                         | 9       | Describe any efforts to address potential sources of bias P.4-5                                                                                                                                                                                                                                                                                                                                                                                                   |
| Study size                   | 10      | Explain how the study size was arrived at P.4-5                                                                                                                                                                                                                                                                                                                                                                                                                   |
| Quantitative variables       | 11      | Explain how quantitative variables were handled in the analyses. If applicable, describe which groupings were chosen and why P.6                                                                                                                                                                                                                                                                                                                                  |
| Statistical methods          | 12      | (a) Describe all statistical methods, including those used to control for confounding<br>(b) Describe any methods used to examine subgroups and interactions<br>(c) Explain how missing data were addressed<br>(d) If applicable, describe analytical methods taking account of sampling strategy<br>(e) Describe any sensitivity analyses P.6 all of the above as applicable                                                                                     |
| <b>Results</b>               |         |                                                                                                                                                                                                                                                                                                                                                                                                                                                                   |
| Participants                 | 13*     | (a) Report numbers of individuals at each stage of study—eg numbers potentially eligible, examined for eligibility, confirmed eligible, included in the study, completing follow-up, and analysed P 4-6<br>(b) Give reasons for non-participation at each stage P.4-6<br>(c) Consider use of a flow diagram Not appropriate for this analysis                                                                                                                     |
| Descriptive data             | 14*     | (a) Give characteristics of study participants (eg demographic, clinical, social) and information on exposures and potential confounders P. 6, Table 1<br>(b) Indicate number of participants with missing data for each variable of interest P.4, P. 6-7                                                                                                                                                                                                         |
| Outcome data                 | 15*     | Report numbers of outcome events or summary measures P.7                                                                                                                                                                                                                                                                                                                                                                                                          |
| Main results                 | 16      | (a) Give unadjusted estimates and, if applicable, confounder-adjusted estimates and their precision (eg, 95% confidence interval). Make clear which confounders were adjusted for and why they were included<br>(b) Report category boundaries when continuous variables were categorized<br>(c) If relevant, consider translating estimates of relative risk into absolute risk for a meaningful time period P.7-8, Tables 2 & 3 for all of the above categories |

|                          |    |                                                                                                                                                                                   |
|--------------------------|----|-----------------------------------------------------------------------------------------------------------------------------------------------------------------------------------|
| Other analyses           | 17 | Report other analyses done—eg analyses of subgroups and interactions, and sensitivity analyses P. 8                                                                               |
| <b>Discussion</b>        |    |                                                                                                                                                                                   |
| Key results              | 18 | Summarise key results with reference to study objectives P.8                                                                                                                      |
| Limitations              | 19 | Discuss limitations of the study, taking into account sources of potential bias or imprecision. Discuss both direction and magnitude of any potential bias P.10                   |
| Interpretation           | 20 | Give a cautious overall interpretation of results considering objectives, limitations, multiplicity of analyses, results from similar studies, and other relevant evidence P.9-10 |
| Generalisability         | 21 | Discuss the generalisability (external validity) of the study results P.8-10                                                                                                      |
| <b>Other information</b> |    |                                                                                                                                                                                   |
| Funding                  | 22 | Give the source of funding and the role of the funders for the present study and, if applicable, for the original study on which the present article is based P. 12               |

\*Give information separately for exposed and unexposed groups.

**Note:** An Explanation and Elaboration article discusses each checklist item and gives methodological background and published examples of transparent reporting. The STROBE checklist is best used in conjunction with this article (freely available on the Web sites of PLoS Medicine at <http://www.plosmedicine.org/>, Annals of Internal Medicine at <http://www.annals.org/>, and Epidemiology at <http://www.epidem.com/>). Information on the STROBE Initiative is available at [www.strobe-statement.org](http://www.strobe-statement.org).
